# Supplementary material for: HIV-1 Tat-mediated astrocytic amyloidosis involves the HIF-1α/lncRNA BACE1-AS axis
Source: PLoS Biol. 2020 May 26;18(5):e3000660. doi: 10.1371/journal.pbio.3000660 (PMC7274476; doi:10.1371/journal.pbio.3000660)
Supplement: S14 Data — (XLSX) [file pbio.3000660.s036.xlsx]

## Sheet: S7A
				Endogenous	Endogenous	Endogenous	Endogenous	Endogenous	Endogenous	Tat	Tat	Tat	Tat	Tat	Tat	HIF-1α OP	HIF-1α OP	HIF-1α OP	HIF-1α OP	HIF-1α OP	HIF-1α OP	HIF-1α OP + Tat	HIF-1α OP + Tat	HIF-1α OP + Tat	HIF-1α OP + Tat	HIF-1α OP + Tat	HIF-1α OP + Tat
				1	1	1	1	1	1	3.35	2.88	2.43	2.7	3	2.8	5.2	6.9	7.3	6	6	7	9.7	6	8.7	7	9	8.5
